# Supplementary material for: Distribution, Characterization, and Diversity of the Endophytic Fungal Communities on Korean Seacoasts Showing Contrasting Geographic Conditions
Source: PubMed Central journal article supplement — Mycobiology. 2017 Sep 30;45(3):150–9. doi: 10.5941/MYCO.2017.45.3.150 (PMC5673510; doi:10.5941/myco.2017.45.3.150), 2017-09-30
Supplement: mb-45-150-s001.pdf [file mb-45-150-s001.pdf]

**Supplementary Table 1.** Information of isolated endophytic fungi from hydrophytes

| Isolation sites                     | Plant species                | Fungal isolates                                        | Accession No.                                            | NCBI BLAST search                                        | Similarity (%)                                          |     |
|-------------------------------------|------------------------------|--------------------------------------------------------|----------------------------------------------------------|----------------------------------------------------------|---------------------------------------------------------|-----|
| Dokdo Islands,<br>Republic of Korea | <i>Sedum<br/>oryzifolium</i> | DSO111                                                 | KU555946                                                 | <i>Penicillium</i> cf. <i>murcianum</i> (KP016844)       | 100                                                     |     |
|                                     |                              | DSO112                                                 | KU555947                                                 | <i>Cladosporium</i> sp. (KT310929)                       | 100                                                     |     |
|                                     |                              | DSO113                                                 | KU555948                                                 | <i>Alternaria</i> cf. <i>alternate</i> (KT192219)        | 100                                                     |     |
|                                     |                              | DSO114                                                 | KU555949                                                 | <i>Mucor</i> cf. <i>circinelloides</i> (KF753949)        | 98                                                      |     |
|                                     |                              | DSO115                                                 | KU555950                                                 | <i>Alternaria</i> cf. <i>alternate</i> (KT192219)        | 100                                                     |     |
|                                     |                              | DSO116                                                 | KU555951                                                 | <i>Penicillium</i> cf. <i>murcianum</i> (KP016844)       | 99                                                      |     |
|                                     |                              | DSO117                                                 | KU555952                                                 | <i>Alternaria</i> cf. <i>alternata</i> (KR912290)        | 100                                                     |     |
|                                     |                              | DSO118                                                 | KU555953                                                 | <i>Penicillium</i> cf. <i>spinulosum</i> (KF876837)      | 100                                                     |     |
|                                     |                              | DSO119                                                 | KU555954                                                 | <i>Penicillium</i> cf. <i>spinulosum</i> (KF876837)      | 100                                                     |     |
|                                     |                              | DSO120                                                 | KU555955                                                 | <i>Fusarium</i> cf. <i>oxysporum</i> (KT803066)          | 100                                                     |     |
|                                     |                              | DSO121                                                 | KU555956                                                 | <i>Fusarium</i> cf. <i>tricinctum</i> (KT192404)         | 100                                                     |     |
|                                     |                              | DSO122                                                 | KU555957                                                 | <i>Fusarium</i> cf. <i>equiseti</i> (KT192274)           | 100                                                     |     |
|                                     |                              | DSO123                                                 | KU555958                                                 | <i>Fusarium</i> cf. <i>oxysporum</i> (KT803066)          | 100                                                     |     |
|                                     |                              | DSO124                                                 | KU555959                                                 | <i>Plectosphaerella</i> cf. <i>cucumerina</i> (KP780283) | 100                                                     |     |
|                                     |                              | DSO125                                                 | KU555960                                                 | <i>Penicillium</i> cf. <i>citrinum</i> (KP329838)        | 100                                                     |     |
|                                     |                              | DSO126                                                 | KU555961                                                 | <i>Clonostachys</i> cf. <i>rosea</i> (FJ025204)          | 100                                                     |     |
|                                     |                              | DSO127                                                 | KU555962                                                 | <i>Penicillium</i> cf. <i>palmense</i> (KJ834515)        | 100                                                     |     |
|                                     |                              | DSO128                                                 | KU555963                                                 | <i>Fusarium</i> cf. <i>tricinctum</i> (KM280050)         | 100                                                     |     |
|                                     |                              | DSO129                                                 | KU555964                                                 | <i>Stemphylium</i> cf. <i>lycopersici</i> (KT957741)     | 100                                                     |     |
|                                     |                              | DSO130                                                 | KU555965                                                 | <i>Cladosporium</i> cf. <i>uredinicola</i> (KT310937)    | 100                                                     |     |
|                                     |                              | DSO131                                                 | KU555966                                                 | <i>Fusarium</i> cf. <i>oxysporum</i> (KR997535)          | 100                                                     |     |
|                                     |                              | DSO132                                                 | KU555967                                                 | <i>Fusarium</i> cf. <i>oxysporum</i> (KT876694)          | 100                                                     |     |
|                                     |                              | <i>Lysimachia<br/>mauritiana</i>                       | DLM111                                                   | KU555968                                                 | <i>Cladosporium</i> cf. <i>allicinum</i> (KP701924)     | 100 |
|                                     |                              |                                                        | DLM112                                                   | KU555969                                                 | <i>Penicillium</i> cf. <i>murcianum</i> (KP016844)      | 100 |
|                                     |                              |                                                        | DLM113                                                   | KU555970                                                 | <i>Penicillium</i> cf. <i>citrinum</i> (JF327822)       | 100 |
|                                     |                              |                                                        | DLM114                                                   | KU555971                                                 | <i>Penicillium</i> cf. <i>guanacastense</i> (KF991208)  | 99  |
|                                     |                              |                                                        | DLM115                                                   | KU555972                                                 | <i>Aspergillus</i> cf. <i>flavipes</i> (KT809365)       | 100 |
|                                     |                              |                                                        | DLM116                                                   | KU555973                                                 | <i>Fusarium</i> cf. <i>solani</i> (AB498983)            | 99  |
|                                     |                              |                                                        | DLM117                                                   | KU555974                                                 | <i>Paraphoma</i> cf. <i>chrysanthemicola</i> (KF313119) | 99  |
|                                     |                              |                                                        | DLM118                                                   | KU555975                                                 | <i>Penicillium</i> cf. <i>restrictum</i> (KJ775656)     | 99  |
|                                     |                              |                                                        | DLM119                                                   | KU555976                                                 | <i>Penicillium</i> cf. <i>restrictum</i> (KP016818)     | 99  |
|                                     |                              |                                                        | DLM120                                                   | KU555977                                                 | <i>Talaromyces</i> cf. <i>purpureogenus</i> (EU427301)  | 100 |
|                                     |                              |                                                        | DLM121                                                   | KU555978                                                 | <i>Paraphoma</i> sp. (HQ914822)                         | 99  |
| DLM122                              | KU555979                     |                                                        | <i>Paecilomyces</i> cf. <i>carneus</i> (HQ711848)        | 99                                                       |                                                         |     |
| DLM123                              | KU555980                     |                                                        | <i>Penicillium</i> cf. <i>restrictum</i> (KP016818)      | 99                                                       |                                                         |     |
| DLM124                              | KU555981                     |                                                        | <i>Talaromyces</i> cf. <i>flavus</i> (JF327821)          | 99                                                       |                                                         |     |
| DLM125                              | KU555982                     |                                                        | <i>Colletotrichum</i> cf. <i>destructivum</i> (KP259876) | 99                                                       |                                                         |     |
| <i>Aster<br/>spathulifolius</i>     | DAS111                       | KU555983                                               | <i>Penicillium</i> cf. <i>janczewskii</i> (KP016839)     | 100                                                      |                                                         |     |
|                                     | DAS112                       | KU555984                                               | <i>Penicillium</i> cf. <i>murcianum</i> (KP016844)       | 99                                                       |                                                         |     |
|                                     | DAS113                       | KU555985                                               | <i>Penicillium</i> cf. <i>restrictum</i> (KJ775656)      | 100                                                      |                                                         |     |
|                                     | DAS114                       | KU555986                                               | <i>Penicillium</i> cf. <i>murcianum</i> (KP016844)       | 100                                                      |                                                         |     |
|                                     | DAS115                       | KU555987                                               | <i>Fusarium</i> cf. <i>oxysporum</i> (KT803066)          | 99                                                       |                                                         |     |
|                                     | DAS116                       | KU555988                                               | <i>Diaporthe</i> cf. <i>melonis</i> (KF053673)           | 99                                                       |                                                         |     |
|                                     | DAS117                       | KU555989                                               | <i>Paraphoma</i> sp. (KT268593)                          | 99                                                       |                                                         |     |
|                                     | DAS118                       | KU555990                                               | <i>Plectosphaerella</i> cf. <i>cucumerina</i> (KT699136) | 100                                                      |                                                         |     |
|                                     | DAS119                       | KU555991                                               | <i>Penicillium</i> cf. <i>pasqualense</i> (NR121513)     | 99                                                       |                                                         |     |
|                                     | DAS120                       | KU555992                                               | <i>Penicillium</i> cf. <i>restrictum</i> (KP016818)      | 99                                                       |                                                         |     |
|                                     | DAS121                       | KU555993                                               | <i>Phialophora</i> cf. <i>mustea</i> (JX406525)          | 100                                                      |                                                         |     |
|                                     | DAS122                       | KU555994                                               | <i>Paraphoma</i> sp. (JN585935)                          | 98                                                       |                                                         |     |
|                                     | DAS123                       | KU555995                                               | <i>Talaromyces</i> cf. <i>flavus</i> (KF917583)          | 99                                                       |                                                         |     |
|                                     | DAS124                       | KU555996                                               | <i>Fusarium</i> cf. <i>oxysporum</i> (KT343974)          | 100                                                      |                                                         |     |
|                                     | DAS125                       | KU555997                                               | <i>Penicillium</i> cf. <i>citrinum</i> (LC106114)        | 100                                                      |                                                         |     |
| DAS126                              | KU555998                     | <i>Aspergillus</i> cf. <i>iizukae</i> (KM215631)       | 99                                                       |                                                          |                                                         |     |
| DAS127                              | KU555999                     | <i>Purpureocillium</i> cf. <i>lilacinum</i> (FJ765024) | 100                                                      |                                                          |                                                         |     |
| DAS128                              | KU556000                     | <i>Penicillium</i> cf. <i>murcianum</i> (KP016844)     | 100                                                      |                                                          |                                                         |     |
| DAS129                              | KU556001                     | <i>Phialophora</i> cf. <i>mustea</i> (KF850364)        | 99                                                       |                                                          |                                                         |     |
| DAS130                              | KU556002                     | <i>Penicillium</i> cf. <i>griseofulvum</i> (AY373917)  | 100                                                      |                                                          |                                                         |     |

Supplementary Table 1. Continued

| Isolation sites                | Plant species         | Fungal isolates                                      | Accession No.                                           | NCBI BLAST search                                         | Similarity (%) |
|--------------------------------|-----------------------|------------------------------------------------------|---------------------------------------------------------|-----------------------------------------------------------|----------------|
| East Sea,<br>Republic of Korea | <i>S. oryzipolium</i> | DAS131                                               | KU556003                                                | <i>Penicillium</i> cf. <i>janthinellum</i> (HQ839780)     | 100            |
|                                |                       | DAS132                                               | KU556004                                                | <i>Aspergillus</i> cf. <i>iizukae</i> (KM215631)          | 99             |
|                                |                       | DAS133                                               | KU556005                                                | <i>Phialophora</i> cf. <i>mustea</i> (AB190404)           | 99             |
|                                |                       | DAS134                                               | KU556006                                                | <i>Fusarium</i> cf. <i>solani</i> (KR997532)              | 100            |
|                                |                       | ESO111                                               | KU556007                                                | <i>Fusarium</i> sp. (KT269398)                            | 100            |
|                                |                       | ESO112                                               | KU556008                                                | <i>Fusarium</i> cf. <i>oxysporum</i> (KT223348)           | 100            |
|                                |                       | ESO113                                               | KU556009                                                | <i>Fusarium</i> cf. <i>annulatum</i> (AY213654)           | 99             |
|                                |                       | ESO114                                               | KU556010                                                | <i>Alternaria</i> cf. <i>tenuissima</i> (KR912296)        | 100            |
|                                |                       | ESO115                                               | KU556011                                                | <i>Fusarium</i> cf. <i>oxysporum</i> (KT223348)           | 100            |
|                                |                       | ESO116                                               | KU556012                                                | <i>Colletotrichum</i> cf. <i>guajavae</i> (KJ947302)      | 100            |
|                                |                       | ESO117                                               | KU556013                                                | <i>Penicillium</i> cf. <i>oxalicum</i> (KT189514)         | 100            |
|                                |                       | ESO118                                               | KU556014                                                | <i>Fusarium</i> cf. <i>oxysporum</i> (KT215404)           | 99             |
|                                |                       | ESO119                                               | KU556015                                                | <i>Fusarium</i> cf. <i>tricinctum</i> (KT192246)          | 100            |
|                                |                       | ESO120                                               | KU556016                                                | <i>Fusarium</i> cf. <i>solani</i> (KR997533)              | 100            |
|                                |                       | ESO121                                               | KU556017                                                | <i>Fusarium</i> cf. <i>solani</i> (KP881510)              | 100            |
|                                |                       | ESO122                                               | KU556018                                                | <i>Ceratobasidium</i> sp. (JX913817)                      | 100            |
|                                |                       | ESO123                                               | KU556019                                                | <i>Ilyonectria</i> sp. (KT270296)                         | 100            |
|                                |                       | ESO124                                               | KU556020                                                | <i>Curvularia</i> cf. <i>inaequalis</i> (AF313409)        | 99             |
|                                |                       | ESO125                                               | KU556021                                                | <i>Fusarium</i> cf. <i>equiseti</i> (KR364600)            | 99             |
|                                |                       | ESO126                                               | KU556022                                                | <i>Cladosporium</i> cf. <i>cladosporioides</i> (KT037422) | 100            |
|                                |                       | ESO127                                               | KU556023                                                | <i>Alternaria</i> cf. <i>alternata</i> (KT192219)         | 100            |
|                                |                       | ESO128                                               | KU556024                                                | <i>Fusarium</i> cf. <i>solani</i> (KT362213)              | 100            |
|                                |                       | ESO129                                               | KU556025                                                | <i>Fusarium</i> cf. <i>solani</i> (KT366735)              | 100            |
|                                |                       | ESO130                                               | KU556026                                                | <i>Fusarium</i> cf. <i>acuminatum</i> (KR364583)          | 100            |
|                                |                       | ESO131                                               | KU556027                                                | <i>Fusarium</i> cf. <i>solani</i> (KT362213)              | 100            |
|                                |                       | ESO132                                               | KU556028                                                | <i>Cladosporium</i> sp. (KT270261)                        | 100            |
|                                |                       | ESO133                                               | KU556029                                                | <i>Ilyonectria</i> sp. (KT270296)                         | 100            |
|                                |                       | ESO134                                               | KU556030                                                | <i>Aspergillus</i> cf. <i>japonicas</i> (KF031031)        | 100            |
|                                |                       | ESO135                                               | KU556031                                                | <i>Penicillium</i> cf. <i>murcianum</i> (KP016844)        | 100            |
|                                |                       | ESO136                                               | KU556032                                                | <i>Fusarium</i> cf. <i>oxysporum</i> (KR997535)           | 100            |
|                                |                       | ESO137                                               | KU556033                                                | <i>Mucor</i> cf. <i>circinelloides</i> (JX094799)         | 100            |
|                                |                       | ESO138                                               | KU556034                                                | <i>Fusarium</i> cf. <i>oxysporum</i> (KT884661)           | 100            |
|                                |                       | ESO139                                               | KU556035                                                | <i>Fusarium</i> cf. <i>solani</i> (KP881510)              | 100            |
|                                |                       | ESO140                                               | KU556036                                                | <i>Penicillium</i> cf. <i>murcianum</i> (KP016844)        | 100            |
|                                |                       | ESO141                                               | KU556037                                                | <i>Penicillium</i> cf. <i>janthinellum</i> (KM268682)     | 100            |
|                                |                       | ESO142                                               | KU556038                                                | <i>Fusarium</i> cf. <i>tricinctum</i> (KT192246)          | 100            |
|                                |                       | ESO143                                               | KU556039                                                | <i>Aspergillus</i> cf. <i>japonicus</i> (JN676110)        | 100            |
|                                |                       | ESO144                                               | KU556040                                                | <i>Fusarium</i> cf. <i>oxysporum</i> (KT343974)           | 100            |
|                                |                       | ESO145                                               | KU556041                                                | <i>Cladosporium</i> cf. <i>cladosporioides</i> (KR673902) | 100            |
|                                |                       | ESO146                                               | KU556042                                                | <i>Fusarium</i> cf. <i>delphinooides</i> (NR130680)       | 100            |
|                                |                       | ESO147                                               | KU556043                                                | <i>Fusarium</i> cf. <i>oxysporum</i> (KT876692)           | 99             |
|                                |                       | ESO148                                               | KU556044                                                | <i>Fusarium</i> cf. <i>avenaceum</i> (KT350588)           | 99             |
| ESO149                         | KU556045              | <i>Fusarium</i> cf. <i>oxysporum</i> (KT215403)      | 100                                                     |                                                           |                |
| ESO150                         | KU556046              | <i>Talaromyces</i> cf. <i>flavus</i> (KF917583)      | 100                                                     |                                                           |                |
| ESO151                         | KU556047              | <i>Macrophomina</i> cf. <i>phaseolina</i> (KF951632) | 100                                                     |                                                           |                |
| <i>L. mauritiana</i>           | ELM111                | KU556048                                             | <i>Ilyonectria</i> sp. (KT268465)                       | 99                                                        |                |
|                                | ELM112                | KU556049                                             | <i>Leptosphaeria</i> sp. (AB752252)                     | 100                                                       |                |
|                                | ELM113                | KU556050                                             | <i>Cadophora</i> cf. <i>luteo-olivacea</i> (KP903599)   | 99                                                        |                |
|                                | ELM114                | KU556051                                             | <i>Penicillium</i> cf. <i>dipodomycicola</i> (KR610975) | 100                                                       |                |
|                                | ELM115                | KU556052                                             | <i>Capnodium</i> sp. (HQ914834)                         | 99                                                        |                |
|                                | ELM116                | KU556053                                             | <i>Talaromyces</i> cf. <i>cellulolyticus</i> (KM458826) | 99                                                        |                |
|                                | ELM117                | KU556054                                             | <i>Penicillium</i> cf. <i>spinulosum</i> (KF876837)     | 100                                                       |                |
|                                | ELM118                | KU556055                                             | <i>Penicillium</i> cf. <i>swiecickii</i> (NR121254)     | 98                                                        |                |
|                                | ELM119                | KU556056                                             | <i>Talaromyces</i> cf. <i>verruculosus</i> (HQ608025)   | 100                                                       |                |
|                                | ELM120                | KU556057                                             | <i>Talaromyces</i> cf. <i>verruculosus</i> (KT804160)   | 100                                                       |                |
| ELM121                         | KU556058              | <i>Fusarium</i> cf. <i>oxysporum</i> (KT343974)      | 100                                                     |                                                           |                |
| ELM122                         | KU556059              | <i>Penicillium</i> cf. <i>restrictum</i> (KP016818)  | 100                                                     |                                                           |                |

Supplementary Table 1. Continued

| Isolation sites | Plant species             | Fungal isolates | Accession No. | NCBI BLAST search                                       | Similarity (%) |
|-----------------|---------------------------|-----------------|---------------|---------------------------------------------------------|----------------|
|                 |                           | ELM123          | KU556060      | <i>Microsphaeropsis</i> cf. <i>arundinis</i> (KP230828) | 99             |
|                 |                           | ELM124          | KU556061      | <i>Penicillium</i> cf. <i>restrictum</i> (KP016819)     | 100            |
|                 |                           | ELM125          | KU556062      | <i>Cadophora</i> sp. (KC007166)                         | 100            |
|                 |                           | ELM126          | KU556063      | <i>Alternaria</i> sp. (JQ388267)                        | 99             |
|                 |                           | ELM127          | KU556064      | <i>Neonectria</i> sp. (JX243890)                        | 100            |
|                 |                           | ELM128          | KU556065      | <i>Fusarium</i> cf. <i>proliferatum</i> (KM369868)      | 100            |
|                 |                           | ELM129          | KU556066      | <i>Fusarium</i> sp. (KF151850)                          | 100            |
|                 |                           | ELM130          | KU556067      | <i>Penicillium</i> cf. <i>glabrum</i> (KP329607)        | 99             |
|                 |                           | ELM131          | KU556068      | <i>Neonectria</i> sp. (KF428546)                        | 100            |
|                 |                           | ELM132          | KU556069      | <i>Fusarium</i> cf. <i>oxysporum</i> (KT884661)         | 100            |
|                 |                           | ELM133          | KU556070      | <i>Neonectria</i> sp. (JX244050)                        | 100            |
|                 |                           | ELM134          | KU556071      | <i>Cylindrocarpon</i> sp. (KF631448)                    | 100            |
|                 |                           | ELM135          | KU556072      | <i>Fusarium</i> sp. (KT270080)                          | 99             |
|                 |                           | ELM136          | KU556073      | <i>Cladosporium</i> cf. <i>tenuissimum</i> (KP701910)   | 100            |
|                 |                           | ELM137          | KU556074      | <i>Cylindrocarpon</i> sp. (KF631448 )                   | 100            |
|                 |                           | ELM138          | KU556075      | <i>Alternaria</i> cf. <i>tenuissima</i> (KR912296)      | 100            |
|                 |                           | ELM139          | KU556076      | <i>Ilyonectria</i> cf. <i>robusta</i> (JF735265)        | 100            |
|                 |                           | ELM140          | KU556077      | <i>Ilyonectria</i> cf. <i>crassa</i> (KF850440)         | 99             |
|                 |                           | ELM141          | KU556078      | <i>Fusarium</i> sp. (KT269393)                          | 100            |
|                 |                           | ELM142          | KU556079      | <i>Neonectria</i> sp. (JX244048)                        | 100            |
|                 |                           | ELM143          | KU556080      | <i>Fusarium</i> cf. <i>equiseti</i> (KR364600)          | 100            |
|                 |                           | ELM144          | KU556081      | <i>Fusarium</i> cf. <i>oxysporum</i> (KM265104)         | 100            |
|                 |                           | ELM145          | KU556082      | <i>Fusarium</i> sp. (KR422347)                          | 100            |
|                 |                           | ELM146          | KU556083      | <i>Ilyonectria</i> cf. <i>crassa</i> (KF850435)         | 99             |
|                 |                           | ELM147          | KU556084      | <i>Fusarium</i> cf. <i>oxysporum</i> (KC329616)         | 100            |
|                 |                           | ELM148          | KU556085      | <i>Penicillium</i> cf. <i>guanacastense</i> (KF991208)  | 100            |
|                 |                           | ELM149          | KU556086      | <i>Fusarium</i> sp. (KR263845)                          | 100            |
|                 |                           | ELM150          | KU556087      | <i>Fusarium</i> cf. <i>oxysporum</i> (KT279876)         | 99             |
|                 | <i>A. sphathulifolius</i> | EAS111          | KU556088      | <i>Fusarium</i> cf. <i>oxysporum</i> (KP903515)         | 100            |
|                 |                           | EAS112          | KU556089      | <i>Penicillium</i> cf. <i>pasqualense</i> (NR121513)    | 100            |
|                 |                           | EAS113          | KU556090      | <i>Absidia</i> sp. (JQ683214)                           | 99             |
|                 |                           | EAS114          | KU556091      | <i>Penicillium</i> sp. (KP689249)                       | 99             |
|                 |                           | EAS115          | KU556092      | <i>Clonostachys</i> cf. <i>rosea</i> (KP269006)         | 99             |
|                 |                           | EAS116          | KU556093      | <i>Penicillium</i> cf. <i>minioluteum</i> (JF910284)    | 99             |
|                 |                           | EAS117          | KU556094      | <i>Penicillium</i> cf. <i>murcianum</i> (KP016844)      | 100            |
|                 |                           | EAS118          | KU556095      | <i>Penicillium</i> cf. <i>pasqualense</i> (NR121513)    | 100            |
|                 |                           | EAS119          | KU556096      | <i>Penicillium</i> sp. (JN686455)                       | 98             |
|                 |                           | EAS120          | KU556097      | <i>Fusarium</i> sp. (KT282392)                          | 100            |
|                 |                           | EAS121          | KU556098      | <i>Paraphoma</i> cf. <i>chrysanthemicola</i> (KF850366) | 99             |
|                 |                           | EAS122          | KU556099      | <i>Fusarium</i> cf. <i>oxysporum</i> (KT215404)         | 100            |
|                 |                           | EAS123          | KU556100      | <i>Gibberella</i> cf. <i>moniliformis</i> (HF546372)    | 100            |
|                 |                           | EAS124          | KU556101      | <i>Fusarium</i> sp. (KT270080)                          | 99             |
|                 |                           | EAS125          | KU556102      | <i>Penicillium</i> sp. (KT268739)                       | 100            |
|                 |                           | EAS126          | KU556103      | <i>Penicillium</i> sp. (KT268722)                       | 100            |
|                 |                           | EAS127          | KU556104      | <i>Penicillium</i> cf. <i>murcianum</i> (KP016844)      | 100            |
|                 |                           | EAS128          | KU556105      | <i>Backusella</i> cf. <i>lamprospora</i> (JQ979458)     | 94             |
|                 |                           | EAS129          | KU556106      | <i>Penicillium</i> cf. <i>viticola</i> (JX003129)       | 99             |
|                 |                           | EAS130          | KU556107      | <i>Penicillium</i> cf. <i>murcianum</i> (KP016843)      | 100            |
|                 |                           | EAS131          | KU556108      | <i>Penicillium</i> cf. <i>sumatrense</i> (KJ775694)     | 99             |
|                 |                           | EAS132          | KU556109      | <i>Fusarium</i> sp. (KT269606)                          | 99             |
|                 |                           | EAS133          | KU556110      | <i>Ilyonectria</i> sp. (KT270236)                       | 100            |
|                 |                           | EAS134          | KU556111      | <i>Fusarium</i> sp. (KT270080)                          | 99             |
|                 |                           | EAS135          | KU556112      | <i>Fusarium</i> sp. (KT323109)                          | 99             |
|                 |                           | EAS136          | KU556113      | <i>Neonectria</i> sp. (KF428413)                        | 100            |
|                 |                           | EAS137          | KU556114      | <i>Aspergillus</i> cf. <i>japonicus</i> (KC128815)      | 100            |
|                 |                           | EAS138          | KU556115      | <i>Gongronella</i> cf. <i>butleri</i> (JN206284)        | 100            |
|                 |                           | EAS139          | KU556116      | <i>Fusarium</i> sp. (KT270240)                          | 99             |

Supplementary Table 1. Continued

| Isolation sites                | Plant species             | Fungal isolates | Accession No.                                       | NCBI BLAST search                                               | Similarity (%) |
|--------------------------------|---------------------------|-----------------|-----------------------------------------------------|-----------------------------------------------------------------|----------------|
|                                |                           | EAS140          | KU556117                                            | <i>Aspergillus</i> cf. <i>aculeatus</i> (NR111412)              | 100            |
|                                |                           | EAS141          | KU556118                                            | <i>Cunninghamella</i> cf. <i>echinulata</i> (JN942997)          | 96             |
|                                |                           | EAS142          | KU556119                                            | <i>Fusarium</i> sp. (KT269516)                                  | 99             |
|                                |                           | EAS143          | KU556120                                            | <i>Ilyonectria</i> sp. (KT270298)                               | 100            |
|                                |                           | EAS144          | KU556121                                            | <i>Fusarium</i> cf. <i>oxysporum</i> (KP903521)                 | 100            |
|                                |                           | EAS145          | KU556122                                            | <i>Penicillium</i> cf. <i>meleagrinum</i> (KP216966)            | 99             |
|                                |                           | EAS146          | KU556123                                            | <i>Penicillium</i> cf. <i>janthinellum</i> (KF906546)           | 100            |
|                                |                           | EAS147          | KU556124                                            | <i>Fusarium</i> cf. <i>equiseti</i> (KR364600)                  | 100            |
| West Sea,<br>Republic of Korea | <i>S. oryzifolium</i>     | WSO111          | KU556125                                            | <i>Penicillium</i> cf. <i>guanacastense</i> (NR111673)          | 99             |
|                                |                           | WSO112          | KU556126                                            | <i>Fusarium</i> cf. <i>redolens</i> (KJ540090)                  | 100            |
|                                |                           | WSO113          | KU556127                                            | <i>Fusarium</i> sp. (KT269829)                                  | 99             |
|                                |                           | WSO114          | KU556128                                            | <i>Fusarium</i> cf. <i>lateritium</i> (KC453998)                | 99             |
|                                |                           | WSO115          | KU556129                                            | <i>Clonostachys</i> cf. <i>rosea</i> (KT876553)                 | 100            |
|                                |                           | WSO116          | KU556130                                            | <i>Fusarium</i> cf. <i>equiseti</i> (KR364599)                  | 100            |
|                                |                           | WSO117          | KU556131                                            | <i>Fusarium</i> cf. <i>solani</i> (KR997533)                    | 100            |
|                                |                           | WSO118          | KU556132                                            | <i>Bartalinia</i> cf. <i>pondoensis</i> (JX854540)              | 99             |
|                                |                           | WSO119          | KU556133                                            | <i>Pestalotiopsis</i> sp. (JF439507)                            | 100            |
|                                |                           | WSO120          | KU556134                                            | <i>Lecanicillium</i> cf. <i>psalliotae</i> (AB378518)           | 99             |
|                                | <i>L. mauritiana</i>      | WLM111          | KU556135                                            | <i>Penicillium</i> cf. <i>viticola</i> (NR121209)               | 99             |
|                                |                           | WLM112          | KU556136                                            | <i>Fusarium</i> cf. <i>oxysporum</i> (KT884661)                 | 99             |
|                                |                           | WLM113          | KU556137                                            | <i>Cladosporium</i> cf. <i>cladosporioides</i> (KT240141)       | 100            |
|                                |                           | WLM114          | KU556138                                            | <i>Fusarium</i> cf. <i>proliferatum</i> (KC793206)              | 100            |
|                                |                           | WLM115          | KU556139                                            | <i>Cladosporium</i> sp. (KT270180)                              | 99             |
|                                |                           | WLM116          | KU556140                                            | <i>Fusarium</i> sp. (KP857663)                                  | 100            |
|                                |                           | WLM117          | KU556141                                            | <i>Cladosporium</i> cf. <i>pseudocladosporioides</i> (KP701949) | 100            |
|                                |                           | WLM118          | KU556142                                            | <i>Clonostachys</i> cf. <i>rosea</i> (FJ025204)                 | 100            |
|                                | <i>A. sphathulifolius</i> | WAS111          | KU556143                                            | <i>Penicillium</i> sp. (JF772181)                               | 99             |
|                                |                           | WAS112          | KU556144                                            | <i>Penicillium</i> cf. <i>thomii</i> (NR077159)                 | 100            |
| WAS113                         |                           | KU556145        | <i>Alternaria</i> sp. (KT323165)                    | 100                                                             |                |
| WAS114                         |                           | KU556146        | <i>Fusarium</i> sp. (KT268902)                      | 100                                                             |                |
| WAS115                         |                           | KU556147        | <i>Penicillium</i> cf. <i>maximae</i> (NR121343)    | 100                                                             |                |
| WAS116                         |                           | KU556148        | <i>Penicillium</i> sp. (KJ174314)                   | 95                                                              |                |
| WAS117                         |                           | KU556149        | <i>Penicillium</i> cf. <i>glabrum</i> (KP329741)    | 100                                                             |                |
| WAS118                         |                           | KU556150        | <i>Fusarium</i> sp. (KT268605)                      | 99                                                              |                |
| WAS119                         |                           | KU556151        | <i>Cercospora</i> cf. <i>beticola</i> (NR121315)    | 99                                                              |                |
| WAS120                         |                           | KU556152        | <i>Penicillium</i> cf. <i>spinulosum</i> (KT266857) | 100                                                             |                |
