# Supplementary material for: Distribution, Characterization, and Diversity of the Endophytic Fungal Communities on Korean Seacoasts Showing Contrasting Geographic Conditions
Source: PubMed Central journal article supplement — Mycobiology. 2017 Sep 30;45(3):150–9. doi: 10.5941/MYCO.2017.45.3.150 (PMC5673510; doi:10.5941/myco.2017.45.3.150), 2017-09-30
Supplement: mb-45-150-s002.pdf [file mb-45-150-s002.pdf]

**Supplementary Table 2.** Distribution of enphytic fungi isolated from halophyte native to the Dokdo Islands

| Host plant                   | Taxonomy                  |                              |                             | Distribution ratio  |                         |      |
|------------------------------|---------------------------|------------------------------|-----------------------------|---------------------|-------------------------|------|
|                              | Pylum                     | Class                        | Genus                       |                     |                         |      |
| <i>Sedum oryzifolium</i>     | Ascomycota (21)           | Dothideomycetes (6)          | <i>Cladosporium</i> (2)     | 9.1                 |                         |      |
|                              |                           |                              | <i>Stemphylium</i> (1)      | 4.5                 |                         |      |
|                              |                           |                              | <i>Alternaria</i> (3)       | 13.6                |                         |      |
|                              |                           | Eurotiomycetes (6)           | <i>Penicillium</i> (6)      | 27.3                |                         |      |
|                              |                           |                              | Sordariomycetes (9)         | <i>Fusarium</i> (7) | 31.8                    |      |
|                              |                           | <i>Lysimachia mauritiana</i> | Ascomycota (15)             | Dothideomycetes (3) | <i>Cladosporium</i> (1) | 6.7  |
|                              |                           |                              |                             |                     | <i>Paraphoma</i> (2)    | 13.3 |
|                              |                           |                              |                             | Eurotiomycetes (10) | <i>Paecilomyces</i> (1) | 6.7  |
|                              |                           |                              |                             |                     | <i>Penicillium</i> (6)  | 40.0 |
|                              |                           |                              |                             |                     | <i>Talaromyces</i> (2)  | 13.3 |
| Sordariomycetes (2)          | <i>Aspergillus</i> (1)    |                              |                             | 6.7                 |                         |      |
|                              | <i>Colletotrichum</i> (1) |                              |                             | 6.7                 |                         |      |
|                              | <i>Fusarium</i> (1)       |                              |                             | 6.7                 |                         |      |
|                              | <i>Paraphoma</i> (2)      |                              |                             | 8.3                 |                         |      |
|                              | <i>Aspergillus</i> (2)    |                              |                             | 8.3                 |                         |      |
| <i>Aster sphathulifolius</i> | Ascomycota (24)           | Dothideomycetes (2)          | <i>Penicillium</i> (10)     | 41.7                |                         |      |
|                              |                           |                              | <i>Phialophora</i> (3)      | 12.5                |                         |      |
|                              |                           | Eurotiomycetes (16)          | <i>Talaromyces</i> (1)      | 4.2                 |                         |      |
|                              |                           |                              | <i>Diaporthe</i> (1)        | 4.2                 |                         |      |
|                              |                           |                              | <i>Fusarium</i> (3)         | 12.5                |                         |      |
|                              |                           | Sordariomycetes (6)          | <i>Purpureocillium</i> (1)  | 4.2                 |                         |      |
|                              |                           |                              | <i>Plectosphaerella</i> (1) | 4.2                 |                         |      |
