# Supplementary material for: Distribution, Characterization, and Diversity of the Endophytic Fungal Communities on Korean Seacoasts Showing Contrasting Geographic Conditions
Source: PubMed Central journal article supplement — Mycobiology. 2017 Sep 30;45(3):150–9. doi: 10.5941/MYCO.2017.45.3.150 (PMC5673510; doi:10.5941/myco.2017.45.3.150), 2017-09-30
Supplement: mb-45-150-s003.pdf [file mb-45-150-s003.pdf]

**Supplementary Table 3.** Distribution of enphytic fungi isolated from halophyte native to the East Sea of Korea

| Host plant                   | Taxonomy                    |                              |                           | Distribution ratio      |                           |                      |
|------------------------------|-----------------------------|------------------------------|---------------------------|-------------------------|---------------------------|----------------------|
|                              | Pylum                       | Class                        | Genus                     |                         |                           |                      |
| <i>Sedum oryzifolium</i>     | Ascomycota (39)             | Dothideomycetes (5)          | <i>Cladosporium</i> (3)   | 7.3                     |                           |                      |
|                              |                             |                              | <i>Alternaria</i> (2)     | 4.9                     |                           |                      |
|                              |                             | Eurotiomycetes (7)           | <i>Aspergillus</i> (2)    | 4.9                     |                           |                      |
|                              |                             |                              | <i>Penicillium</i> (4)    | 9.8                     |                           |                      |
|                              |                             |                              | <i>Talaromyces</i> (1)    | 2.4                     |                           |                      |
|                              |                             |                              | <i>Colletotrichum</i> (1) | 2.4                     |                           |                      |
|                              |                             | Sordariomycetes (25)         | <i>Fusarium</i> (22)      | 53.7                    |                           |                      |
|                              |                             |                              | <i>Ilyonectria</i> (2)    | 4.9                     |                           |                      |
|                              |                             |                              | Dothideomycetes (1)       | <i>Macrophomina</i> (1) | 2.4                       |                      |
|                              |                             |                              | Euascomycetes (1)         | <i>Curvularia</i> (1)   | 2.4                       |                      |
|                              |                             |                              | Basidiomycota (1)         | Agaricomycetes (1)      | <i>Ceratobasidium</i> (1) | 2.4                  |
|                              |                             | Zygomycota (1)               | Mucormycotina (1)         | <i>Mucor</i> (1)        | 2.4                       |                      |
|                              |                             | <i>Lysimachia mauritiana</i> | Ascomycota (40)           | Ascomycetes(2)          | <i>Cadophora</i> (2)      | 5.0                  |
|                              |                             |                              |                           |                         | Dothideomycetes (6)       | <i>Capnodium</i> (1) |
|                              | <i>Cladosporium</i> (1)     |                              |                           | 2.5                     |                           |                      |
|                              | <i>Leptosphaeria</i> (1)    |                              |                           | 2.5                     |                           |                      |
|                              | <i>Microsphaeropsis</i> (1) |                              |                           | 2.5                     |                           |                      |
|                              | <i>Alternaria</i> (2)       |                              |                           | 5.0                     |                           |                      |
| Eurotiomycetes (10)          | <i>Penicillium</i> (7)      |                              |                           | 17.5                    |                           |                      |
|                              | <i>Talaromyces</i> (3)      |                              |                           | 7.5                     |                           |                      |
| Sordariomycetes (22)         | <i>Cylindrocarpon</i> (2)   |                              |                           | 5.0                     |                           |                      |
|                              | <i>Fusarium</i> (12)        |                              |                           | 30.0                    |                           |                      |
|                              | <i>Ilyonectria</i> (4)      |                              |                           | 10.0                    |                           |                      |
|                              | <i>Neonectria</i> (4)       |                              |                           | 10.0                    |                           |                      |
|                              | <i>Paraphoma</i> (1)        |                              |                           | 2.7                     |                           |                      |
|                              | <i>Aspergillus</i> (2)      |                              |                           | 5.4                     |                           |                      |
| <i>Aster sphathulifolius</i> | Ascomycota (33)             | Dothideomycetes (1)          | <i>Penicillium</i> (14)   | 37.8                    |                           |                      |
|                              |                             |                              | <i>Clonostachys</i> (1)   | 2.7                     |                           |                      |
|                              |                             | Eurotiomycetes (16)          | <i>Fusarium</i> (11)      | 29.7                    |                           |                      |
|                              |                             |                              | <i>Ilyonectria</i> (2)    | 5.4                     |                           |                      |
|                              |                             |                              | <i>Neonectria</i> (1)     | 2.7                     |                           |                      |
|                              |                             |                              | <i>Gibberella</i> (1)     | 2.7                     |                           |                      |
|                              |                             |                              | <i>Gongronella</i> (1)    | 2.7                     |                           |                      |
|                              |                             | Trichomycetes (1)            | <i>Absidia</i> (1)        | 2.7                     |                           |                      |
|                              |                             |                              | Zygomycota (4)            | Zygomycetes (3)         | <i>Backusella</i> (1)     | 2.7                  |
|                              |                             |                              | <i>Cunninghamella</i> (1) | 2.7                     |                           |                      |

**Supplementary Table 4.** Distribution of enphytic fungi isolated from halophyte native to the West Sea of Korea

| Host plant                   | Taxonomy        |                     |                           | Distribution ratio    |
|------------------------------|-----------------|---------------------|---------------------------|-----------------------|
|                              | Pylum           | Class               | Genus                     |                       |
| <i>Sedum oryzifolium</i>     | Ascomycota (10) | Eurotiomycetes (1)  | <i>Penicillium</i> (1)    | 10.0                  |
|                              |                 |                     | Sordariomycete (9)        | <i>Bartalinia</i> (1) |
|                              |                 |                     | <i>Clonostachys</i> (1)   | 10.0                  |
|                              |                 |                     | <i>Fusarium</i> (5)       | 50.0                  |
|                              |                 |                     | <i>Lecanicillium</i> (1)  | 10.0                  |
|                              |                 |                     | <i>Pestalotiopsis</i> (1) | 10.0                  |
| <i>Lysimachia mauritiana</i> | Ascomycota (8)  | Dothideomycetes (3) | <i>Cladosporium</i> (3)   | 37.5                  |
|                              |                 | Eurotiomycetes (1)  | <i>Penicillium</i> (1)    | 12.5                  |
|                              |                 | Sordariomycetes (4) | <i>Clonostachys</i> (1)   | 12.5                  |
|                              |                 |                     | <i>Fusarium</i> (3)       | 37.5                  |
| <i>Aster sphathulifolius</i> | Ascomycota (10) | Dothideomycetes (2) | <i>Cercospora</i> (1)     | 10.0                  |
|                              |                 |                     | <i>Alternaria</i> (1)     | 10.0                  |
|                              |                 | Eurotiomycetes (6)  | <i>Penicillium</i> (6)    | 60.0                  |
|                              |                 | Sordariomycetes (2) | <i>Fusarium</i> (2)       | 20.0                  |
